# Supplementary material for: Understandings of Food Insecurity in Aotearoa New Zealand: Considering Practitioners’ Perspectives in a Neoliberal Context Using Q Methodology
Source: MDPI journal article supplement (doi:10.3390/su14010178), 2021-12-24
Supplement: s1 [file s1]

- 1\_Policy makers are properly concerned about the human right to food
- 2\_Free food in schools problematically removes responsibility from parents
- 3\_Nobody in New Zealand should go hungry
- 4\_Corporate donations of food to schools are a good way to reduce food insecurity
- 5\_Society has failed people who use food banks
- 6\_The government should ensure that people do not go hungry
- 7\_Using a food bank is embarrassing, people should not need to use one to be able to eat
- 8\_People have a 'right to food', comparable to their 'right to free speech'
- 9\_The rate of food insecurity is concerning
- 10\_Food insecurity increases health costs for the state
- 11\_No child in New Zealand should go hungry
- 12\_The outcomes of food insecurity are a violations of the human right to health
- 13\_Food insecurity increases health costs for families
- 14\_The impact of food insecurity on public health is a concern for policy makers
- 15\_Mental health issues contribute to food insecurity
- 16\_Structural unemployment and low incomes consign a portion of the population to food insecurity
- 17\_People can avoid food insecurity if they don't make bad choices
- 18\_Beneficiaries receive enough money to cover their costs of living
- 19\_Children go hungry because their parent(s) have made mistakes
- 20\_Some people have a sense of entitlement to free food parcels
- 21\_Food insecurity is not addressed by government policies
- 22\_Parents ought to be enabled to provide for children, not have them fed at school
- 23\_Effectively reducing food insecurity is a moral necessity of government
- 24\_NZ is better equipped to reduce food insecurity than other developed countries
- 25\_The best way to help people struggling on a benefit is to restrict their choices
- 26\_The best way to help people struggling on a low income is to penalise poor behaviour
- 27\_Food insecurity is usually caused by an unexpected household crisis
- 28\_Free food in schools is ineffective because children attend for less than half of a year
- 29\_The efficacy of skills to budget, shop and cook are constrained by personal circumstance
- 30\_Poverty is the primary, underlying cause of food insecurity
- 31\_A household's economic situation can constrain the food choices they can make
- 32\_Growing up in poverty establishes poor dietary habits which are difficult to change
- 33\_It is natural and right that having sufficient food is accessed through having enough money
- 34\_With lesser financial constraints, people take the opportunity to make better choices
- 35\_Food education in schools can help to address food insecurity
- 36\_Most people become food insecure due to circumstances beyond their control
- 37\_Irrational food choices contribute to food insecurity
- 38\_Food banks are an effective way of addressing food insecurity
- 39\_The government is unwilling to examine or publically discuss food insecurity
- 40\_Policies to address food insecurity are not a political priority as it lacks voter concern
- 41\_For many people, nutritional options are limited by financial constraints

42\_ New Zealand society is relying more and more on charity to care for the poorest  
43\_ New Zealanders do not realise the true level of food insecurity in this country  
44\_ Food bank operation shows public willingness to help struggling people  
45\_ A whole of government response is required to address food insecurity, tackling economic & social issues  
46\_ The reasons for food insecurity vary widely between people  
47\_ The poor lack choices in stress relief/treats & are criticised for using the options available  
48\_ Beneficiaries should be accountable to tax-payers for the way they live  
49\_ Public misconceptions about drivers of food insecurity are a barrier to addressing it  
50\_ Lack of mobility/transport contributes to food insecurity  
51\_ The government should ensure that no child goes hungry  
52\_ The welfare state should ensure that all people have basic food, clothing & shelter  
53\_ Insufficient welfare payments contribute to food insecurity  
54\_ Lack of hope, options or prospects corrodes peoples' ability to escape poverty  
55\_ Without external support, intergenerational poverty is entrenched  
56\_ Food bank operation lets government off the hook, providing a 'last resort' below the welfare state  
57\_ Low & minimum wages are not keeping up with rises in the cost of living  
58\_ People struggling on a low income are best helped by education & adequate financial support  
59\_ Promoting affordable housing is important to reduce food insecurity  
60\_ Global and national economic problems increase food insecurity  
61\_ The cost of food in New Zealand is problematically high  
62\_ Food insecurity is a structural effect of low incomes and a corporate food system  
63\_ The institutionalisation of charity (as in USA) should be avoided in New Zealand  
64\_ Food banks should be supported by local or national government  
65\_ The welfare state ought to allow people to thrive, not merely survive  
66\_ The state should not be expected to ensure that everybody has enough food  
67\_ Children deserve more help to be food secure than adults  
68\_ A priority in reducing food insecurity should be regulatory changes to tackle social problems  
69\_ Increasing educational opportunities for women would reduce food insecurity  
70\_ Currently, food banks are the most effective response to food insecurity  
71\_ Food banks are covering holes in the welfare state made by spending cut-backs  
72\_ Charities, not the state, should have ultimate responsibility for those in need  
73\_ Individual generosity is a better solution to food insecurity than government spending  
74\_ Efforts to improve parenting skills would reduce food insecurity  
75\_ Budgeting courses are an effective way to decrease household food insecurity  
76\_ A priority in reducing food insecurity should be benefit levels adequate to provide people's basic needs  
77\_ Free food in schools could effectively address child food insecurity  
78\_ Being employed is not a guarantee of food security
